# Supplementary material for: C-Reactive Protein and Neutrophil/Lymphocytes Ratio: Prognostic Indicator for Doubling Overall Survival Prediction in Pancreatic Cancer Patients
Source: PubMed Central journal article supplement (PMC6912559; doi:10.3390/jcm8111791), 2019-10-25
Supplement: jcm-08-01791-s001.pdf [file jcm-08-01791-s001.pdf]

## Supplemental Table

**Table S1.** List of all applied chemotherapy agents, regardless of therapy line.

| FOLFIRINOX                     |
|--------------------------------|
| Gemcitabine and Nab-paclitaxel |
| Nanoliposomal Irinotecan       |
| Nab-paclitaxel                 |
| Gemcitabine- Erlotinib         |
| Gemcitabine- Oxaliplatin       |
| Docetaxel                      |
| Doxorubicin                    |

## Supplemental Graphic

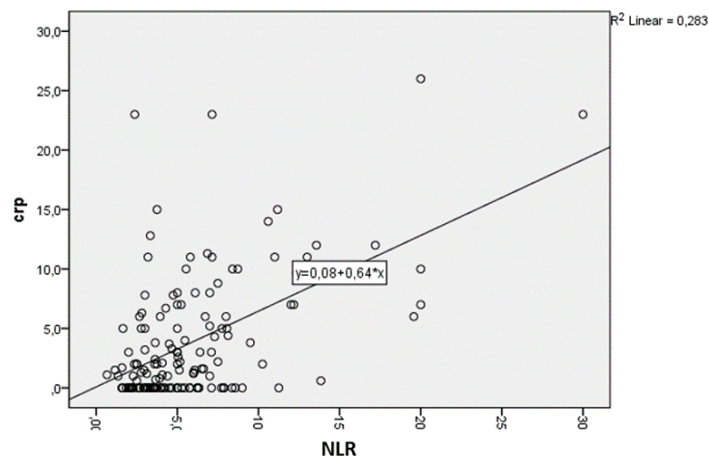

**Figure S1 supplemental:** We found a weak ( $R^2 = 0.25$ ) but significant association between CRP and NLR elevation ( $p < 0.001$ ).
